# Supplementary material
Source: Copernicus journal article supplement (doi:10.5194/npg-33-267-2026)
Supplement: Supplementary file 1 [file npg-33-267-2026-supplement.pdf]

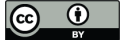

*Supplement of*

**Structural joint modeling of magnetotelluric data and Rayleigh wave dispersion curves using Pareto-based particle swarm optimization: an example to delineate the crustal structure of the southeastern part of the Biga Peninsula in western Anatolia**

**Ersin Büyük et al.**

*Correspondence to:* Ersin Büyük (ebuyuk@gumushane.edu.tr)

The copyright of individual parts of the supplement might differ from the article licence.

**Pareto-MOPSO joint inversion (MT + RWD)**  
Pseudo-code flow for 1-D joint inversion using  
MT apparent resistivity+phase and Rayleigh-wave dispersion curves

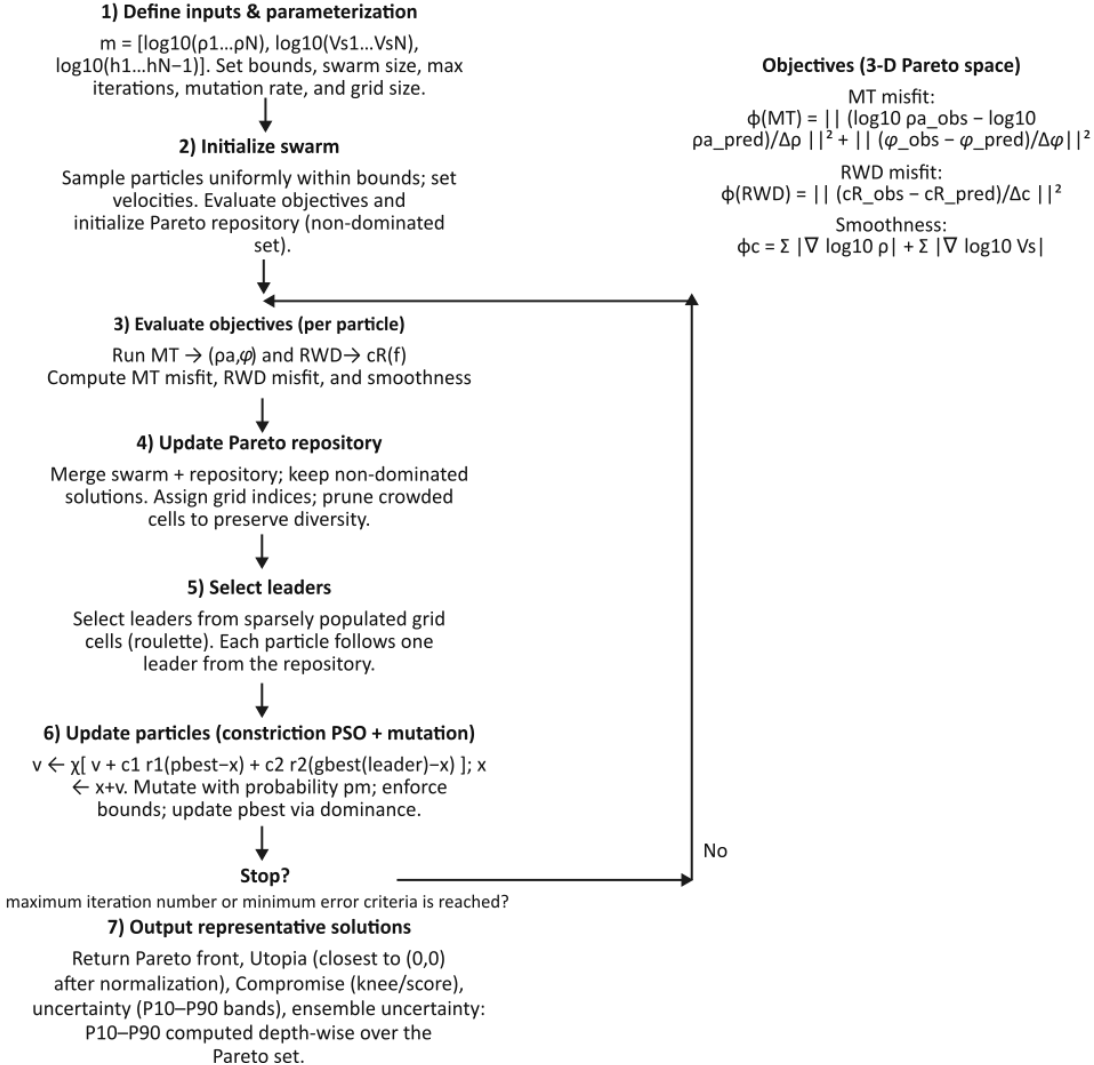

**Figure S1. Flowchart (pseudo-code) of Pareto-MOPSO joint inversion (MT+RWD).**

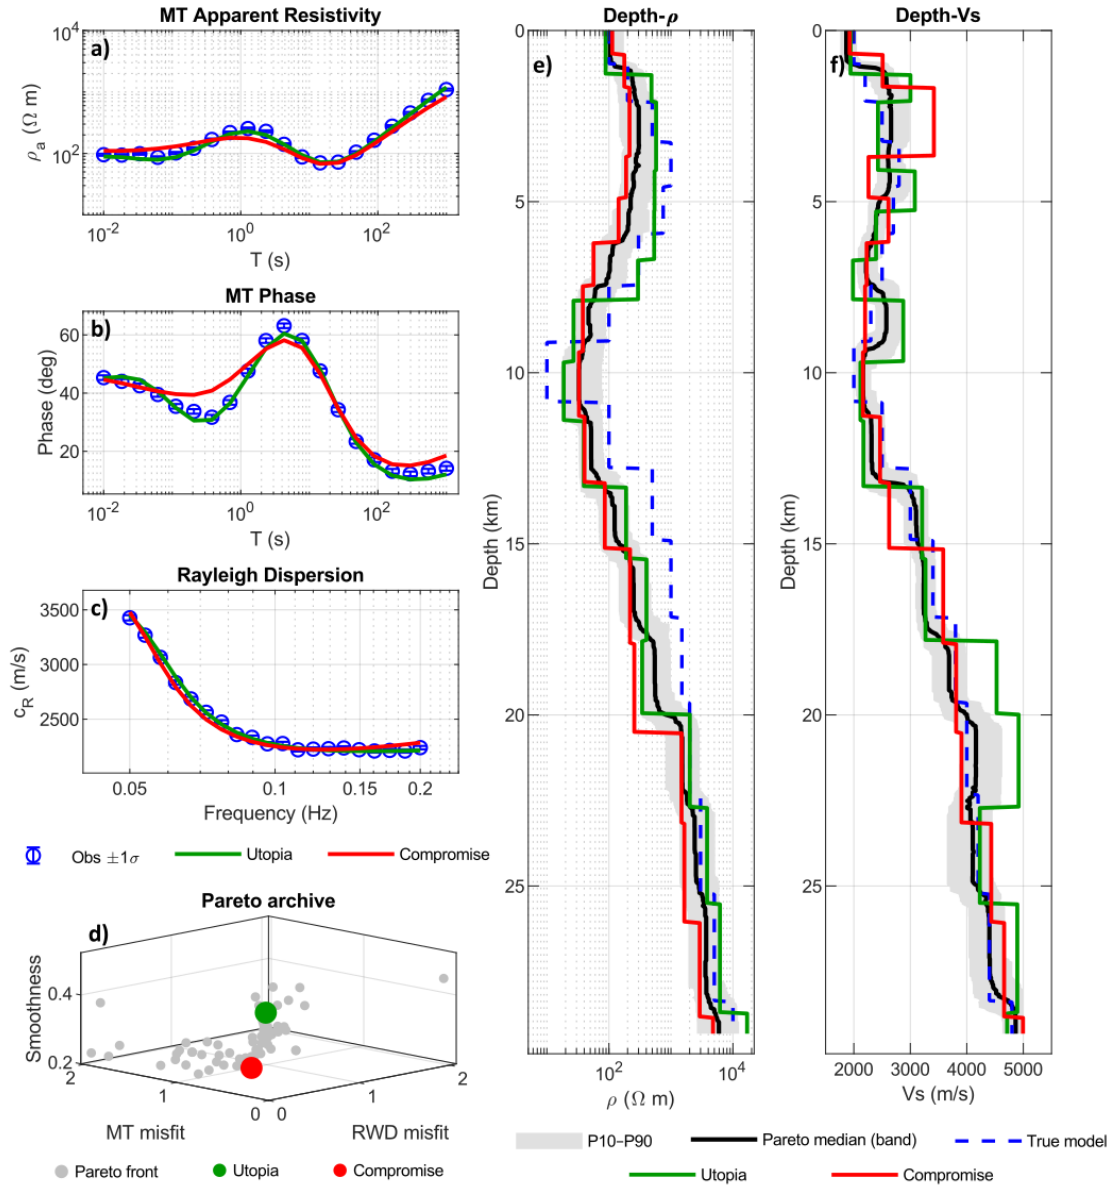

**Figure S2.** Results of noise-sensitivity example for the 5% noisy-coupled case. a) Apparent resistivity, b) Phase data and c) RWD fit with the predicted responses of the selected representative solutions. d) Three-objective Pareto, highlighting the utopia and compromise solutions. e)  $\rho(z)$  and f)  $V_s(z)$  models for the true model and the selected utopia and compromise solutions, together with the P10–P90 envelope and the Pareto-median profile from the repository.

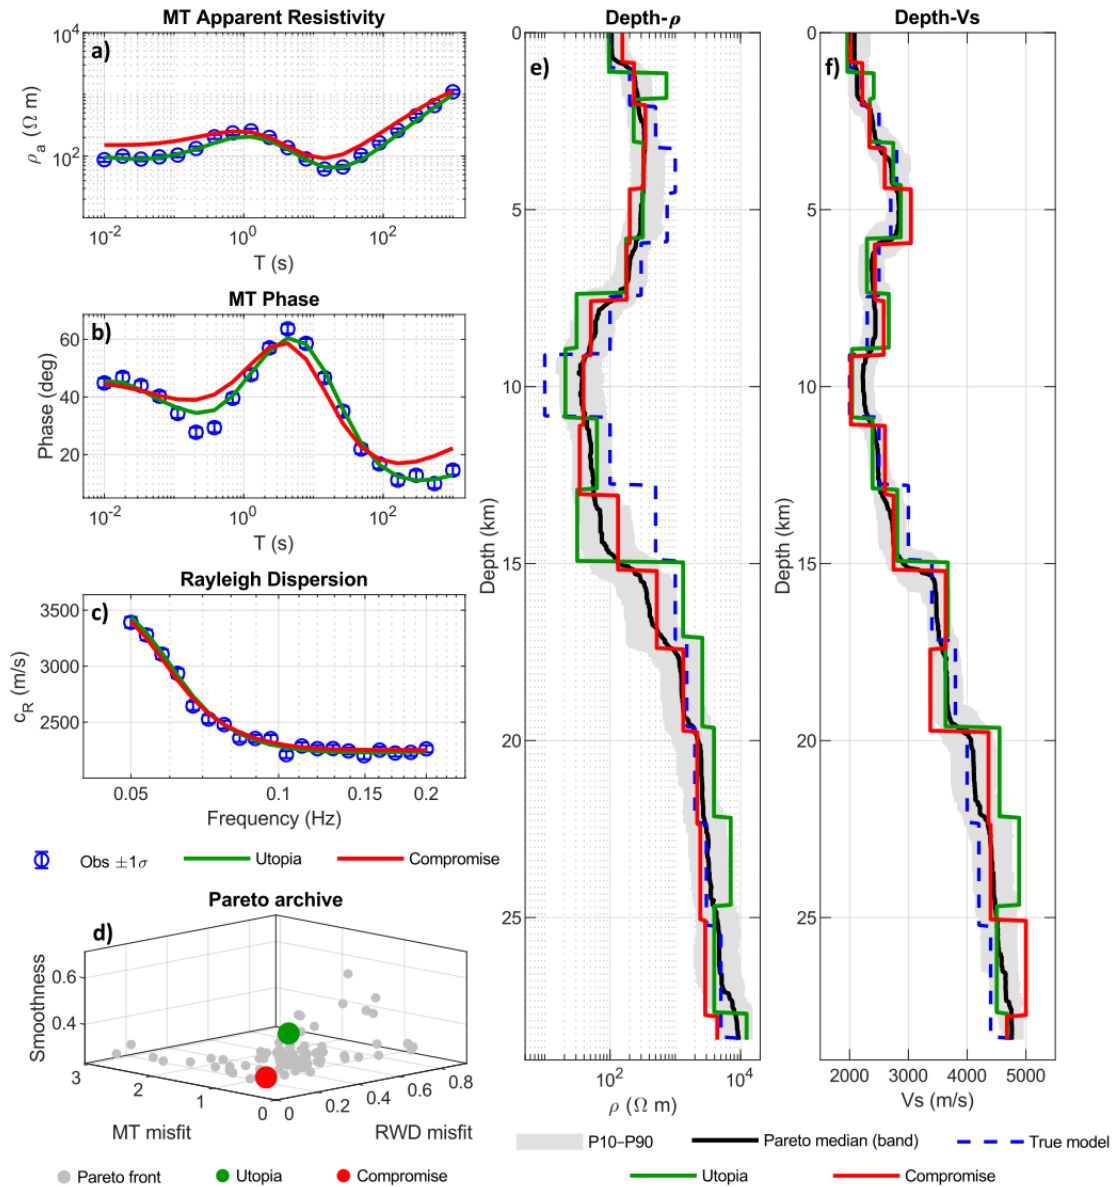

**Figure S3. Results of noise-sensitivity example for the 10% noisy-coupled case. a) Apparent resistivity, b) Phase data and c) RWD fit with the predicted responses of the selected representative solutions. d) Three-objective Pareto, highlighting the utopia and compromise solutions. e)  $\rho(z)$  and f)  $V_s(z)$  models for the true model and the selected utopia and compromise solutions, together with the P10–P90 envelope and the Pareto-median profile from the repository.**

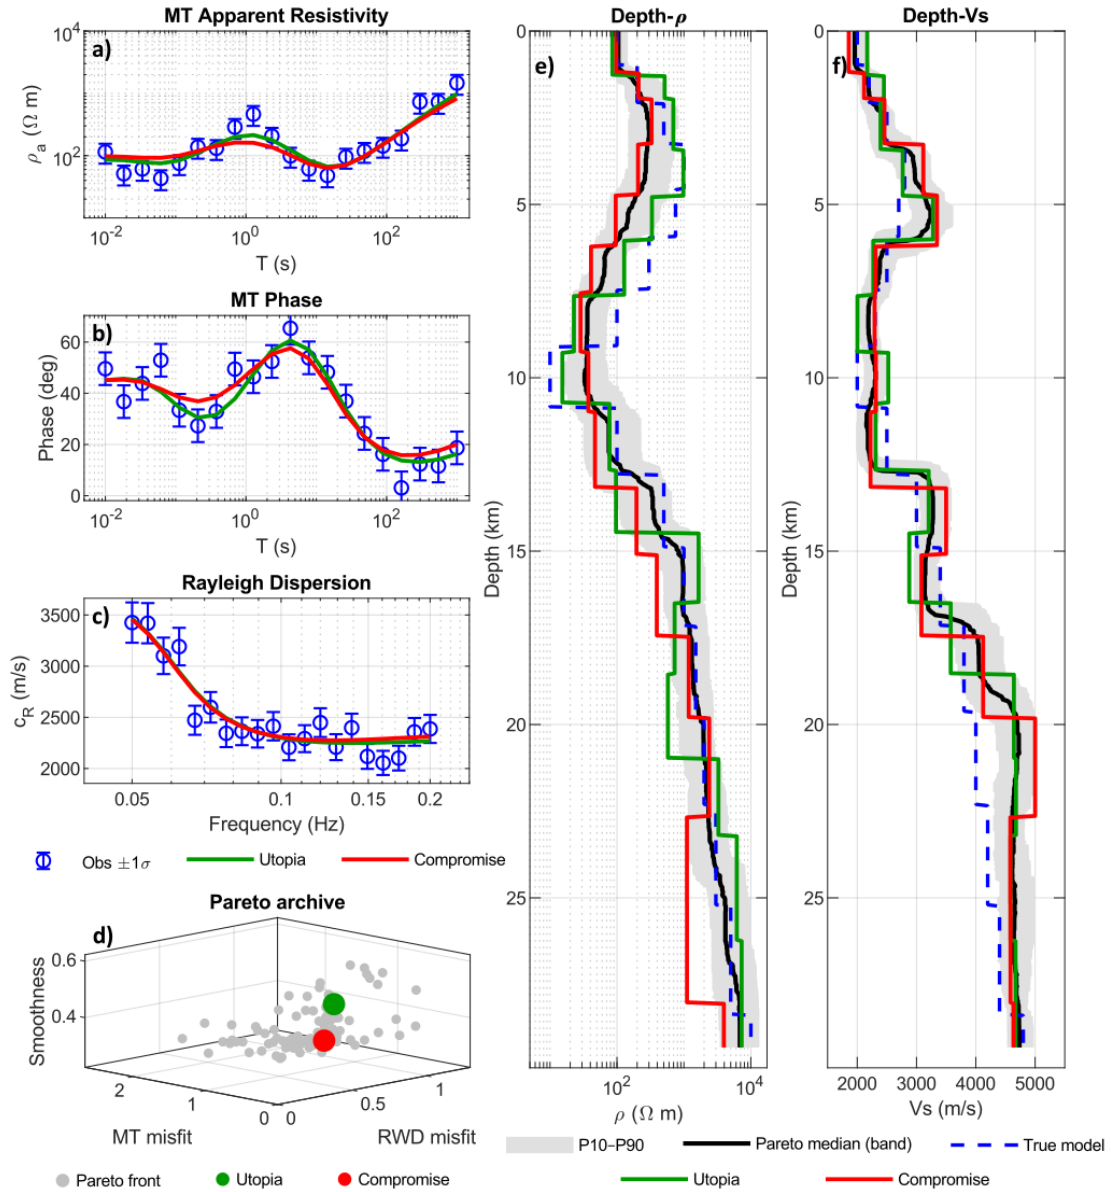

**Figure S4. Results of noise-sensitivity example for the 40% noisy-coupled case. a) Apparent resistivity, b) Phase data and c) RWD fit with the predicted responses of the selected representative solutions. d) Three-objective Pareto, highlighting the utopia and compromise solutions. e)  $\rho(z)$  and f)  $V_s(z)$  models for the true model and the selected utopia and compromise solutions, together with the P10–P90 envelope and the Pareto-median profile from the repository.**

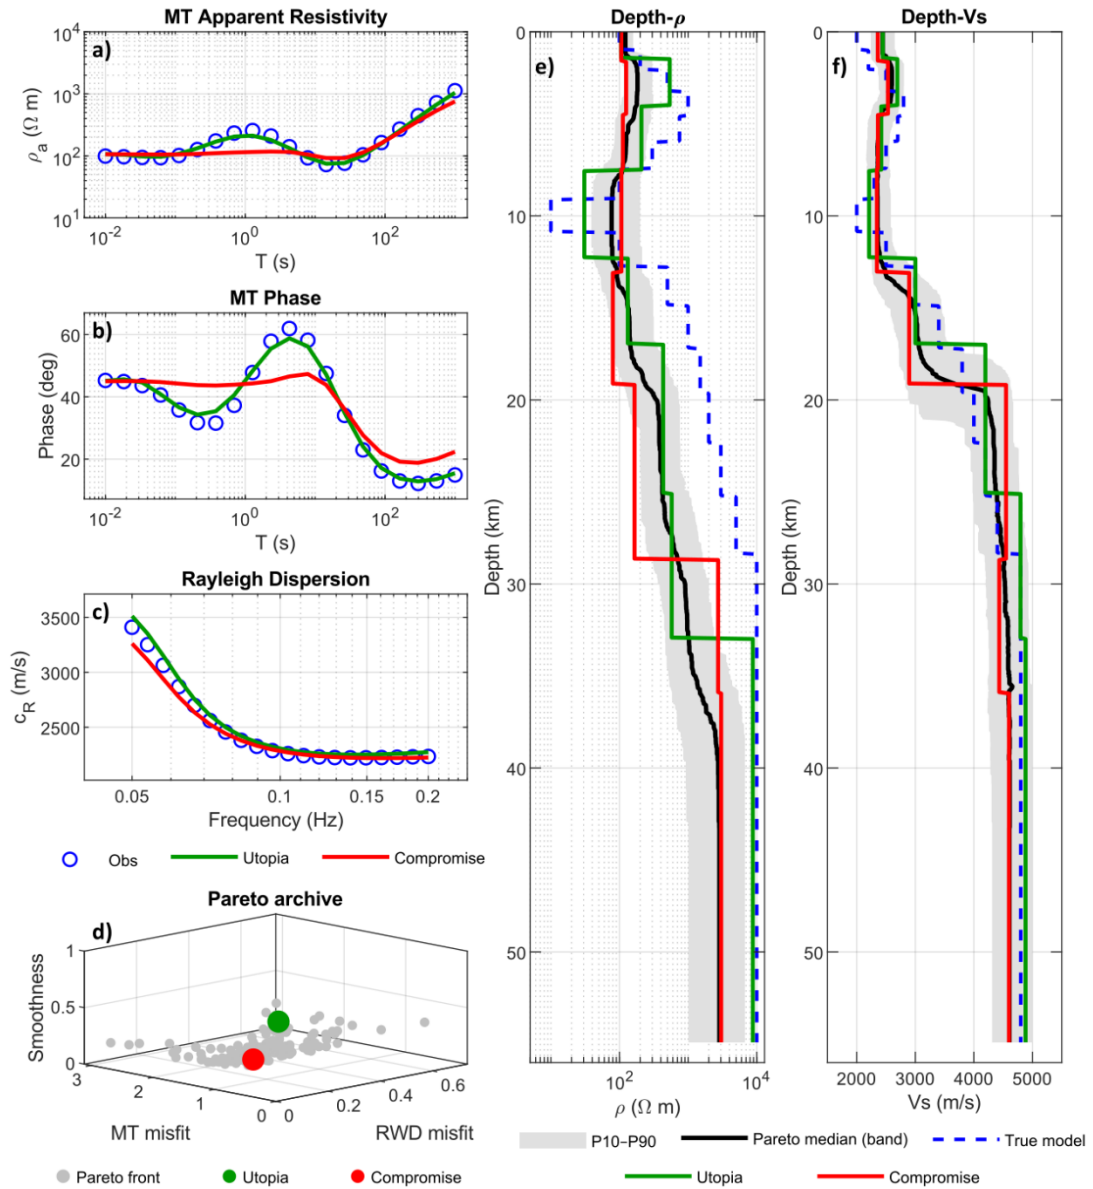

Figure S5. Results of layering-sensitivity example for the  $h=8$  layers. a) Apparent resistivity, b) Phase data and c) RWD fit with the predicted responses of the selected representative solutions. d) Three-objective Pareto, highlighting the utopia and compromise solutions. e)  $\rho(z)$  and f)  $V_s(z)$  models for the true model and the selected utopia and compromise solutions, together with the P10–P90 envelope and the Pareto-median profile from the repository.

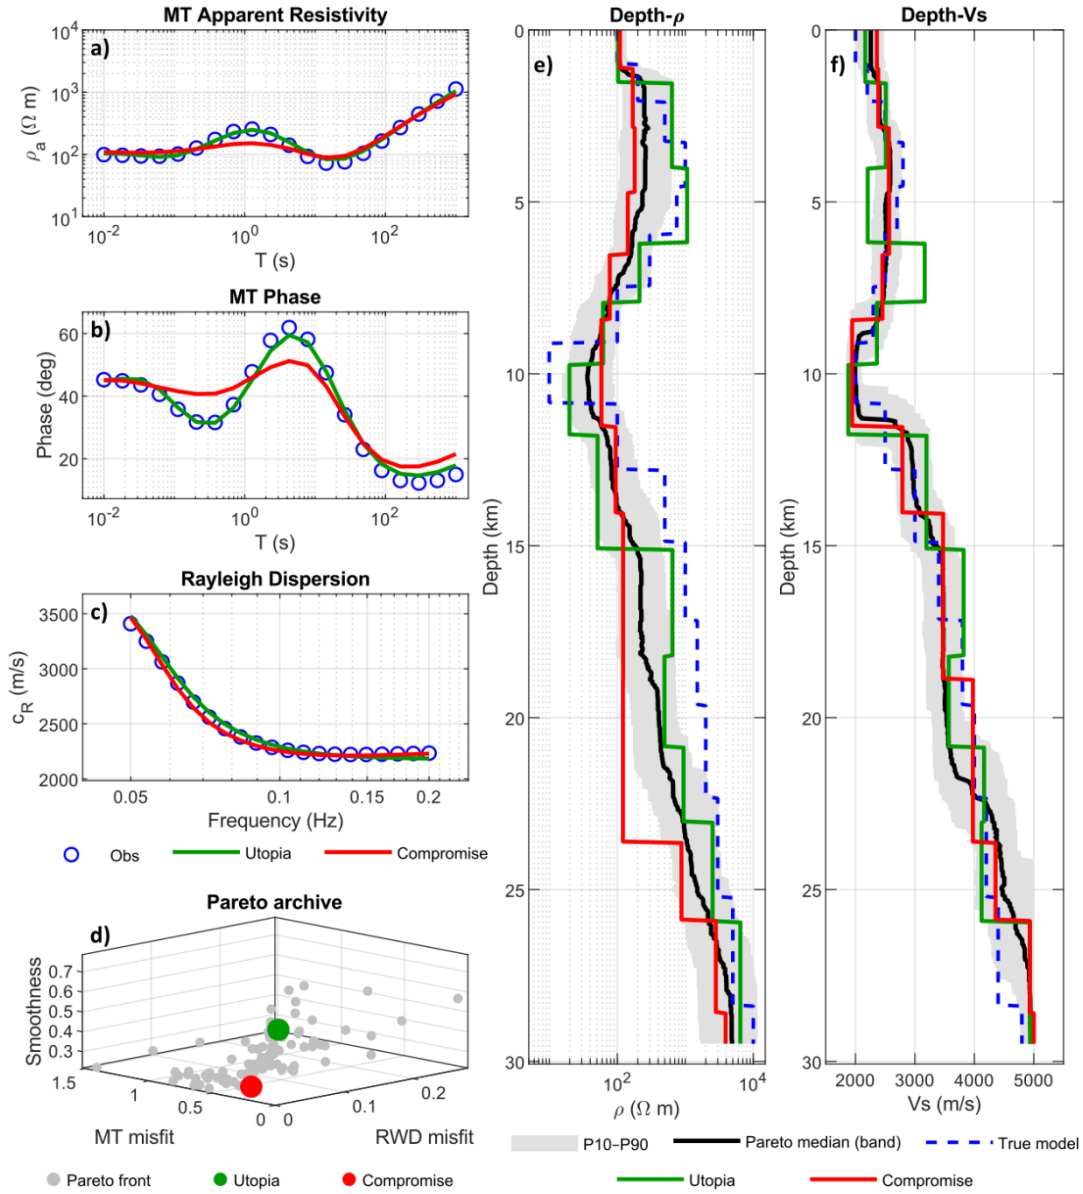

**Figure S6. Results of layering-sensitivity example for the  $h=12$  layers. a) Apparent resistivity, b) Phase data and c) RWD fit with the predicted responses of the selected representative solutions. d) Three-objective Pareto, highlighting the utopia and compromise solutions. e)  $\rho(z)$  and f)  $V_s(z)$  models for the true model and the selected utopia and compromise solutions, together with the P10–P90 envelope and the Pareto-median profile from the repository.**

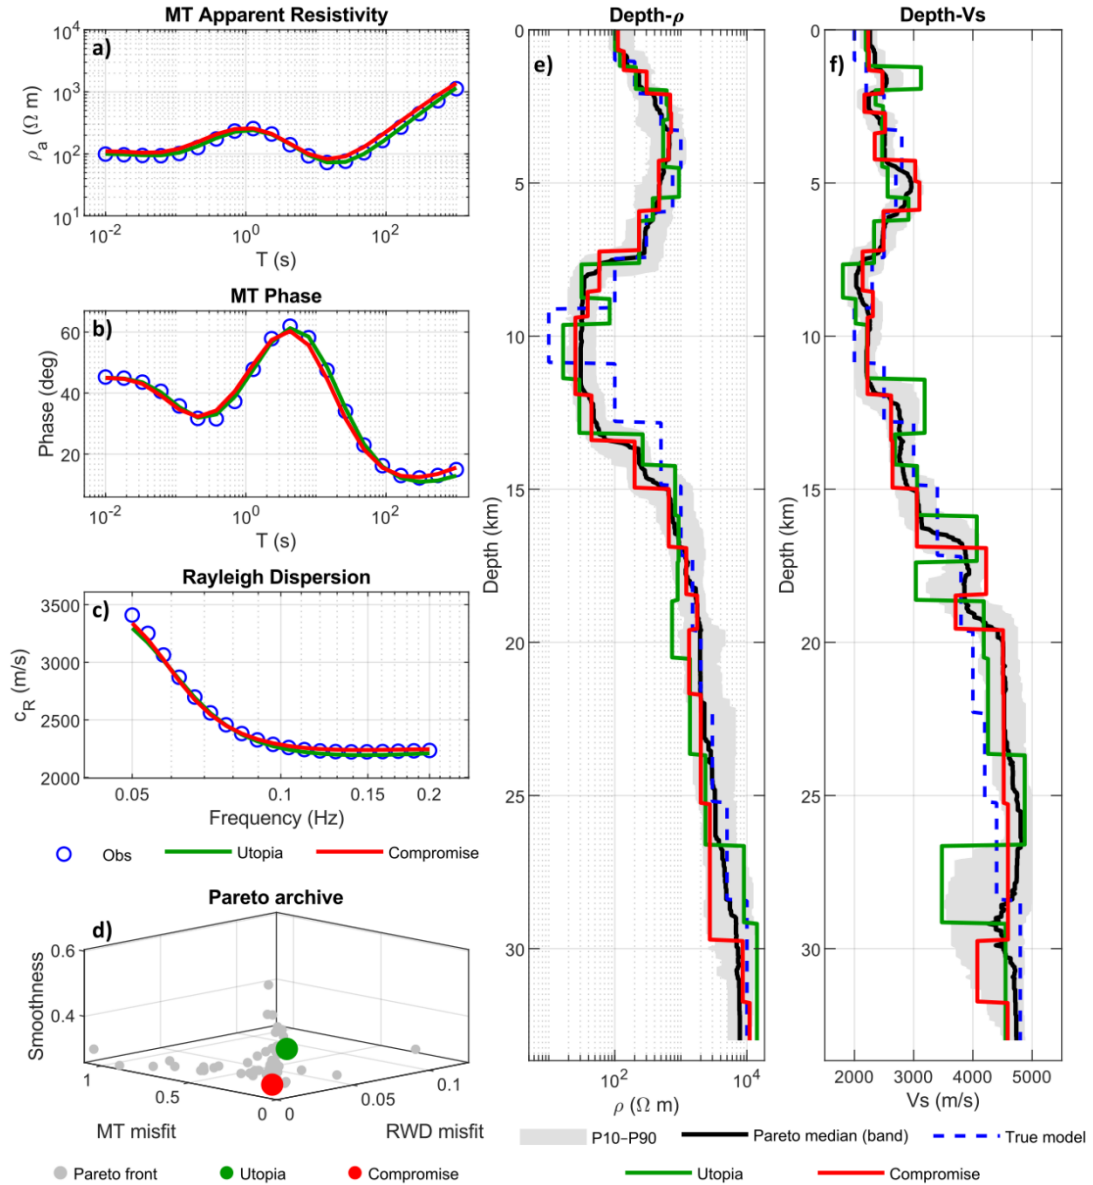

Figure S7. Results of layering-sensitivity example for the  $h=22$  layers. a) Apparent resistivity, b) Phase data and c) RWD fit with the predicted responses of the selected representative solutions. d) Three-objective Pareto, highlighting the utopia and compromise solutions. e)  $\rho(z)$  and f)  $V_s(z)$  models for the true model and the selected utopia and compromise solutions, together with the P10–P90 envelope and the Pareto-median profile from the repository.

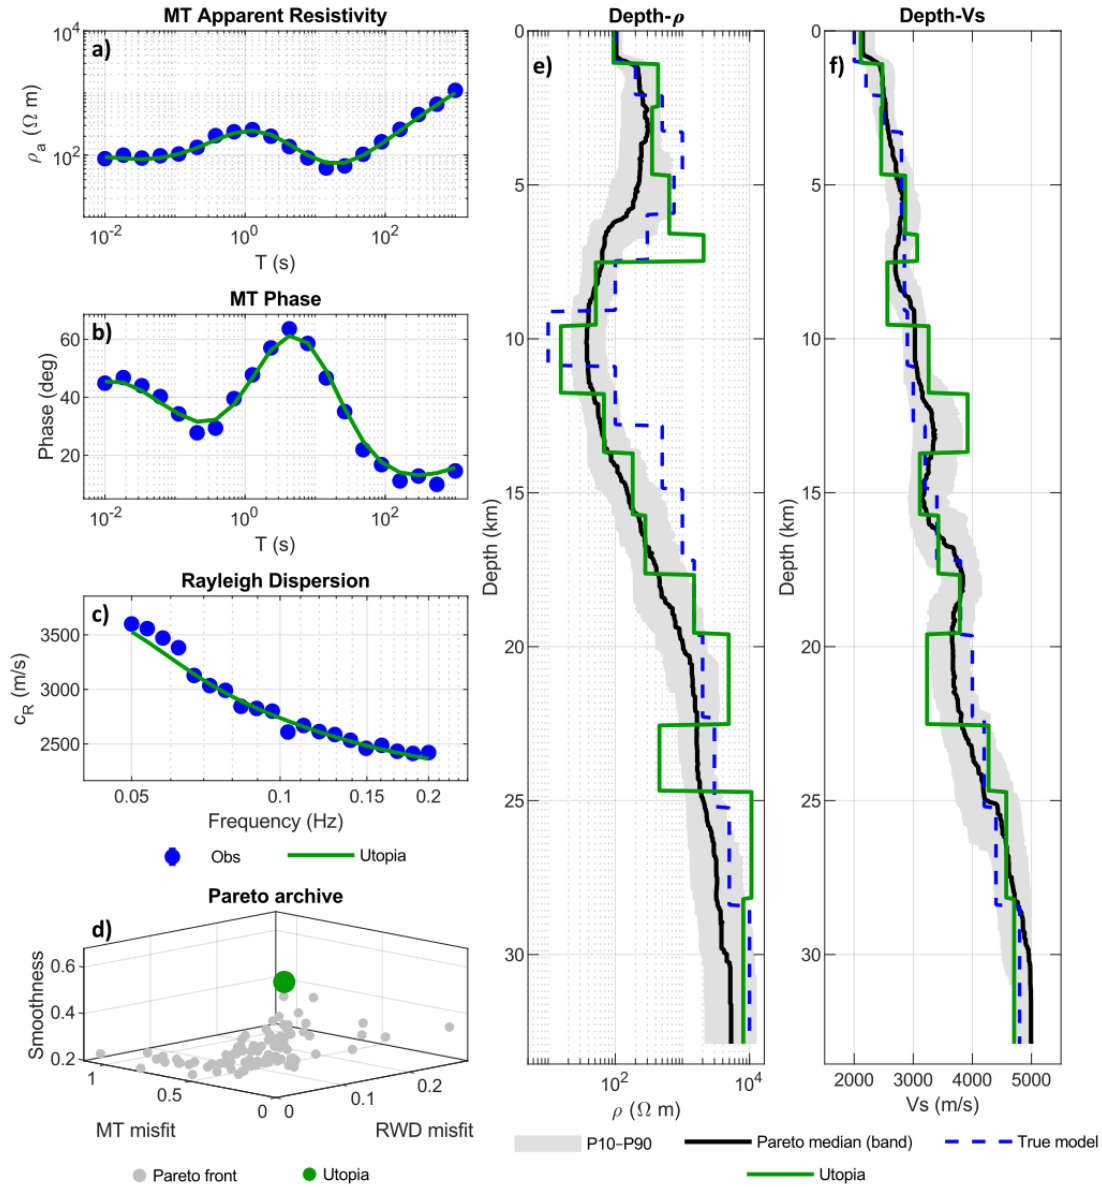

Figure S8. Results of noise-sensitivity example for the 10% noisy-decoupled case#1. a) Apparent resistivity, b) Phase data and c) RWD fit with the predicted responses of the utopia solution. d) Three-objective Pareto archive, highlighting the utopia solution. e)  $\rho(z)$  and f)  $V_s(z)$  for the true model and the selected utopia solution, together with the P10–P90 envelope and the Pareto-median profile from the repository.

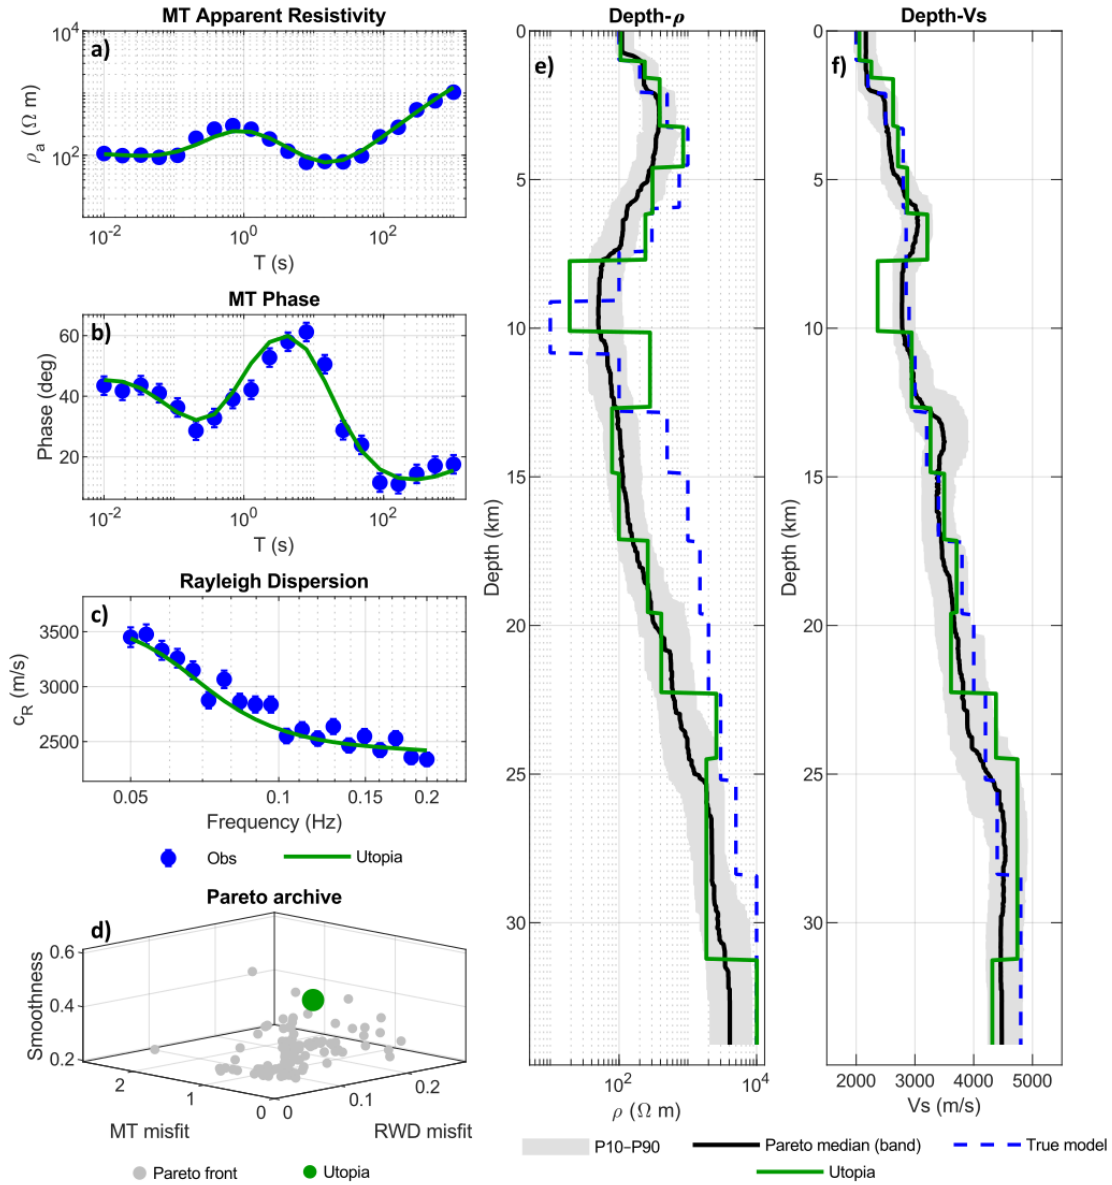

**Figure S9. Results of noise-sensitivity example for the 20% noisy-decoupled case#1. a) Apparent resistivity, b) Phase data and c) RWD fit with the predicted responses of the utopia solution. d) Three-objective Pareto archive, highlighting the utopia solution. e)  $\rho(z)$  and f)  $V_s(z)$  for the true model and the selected utopia solution, together with the P10–P90 envelope and the Pareto-median profile from the repository.**

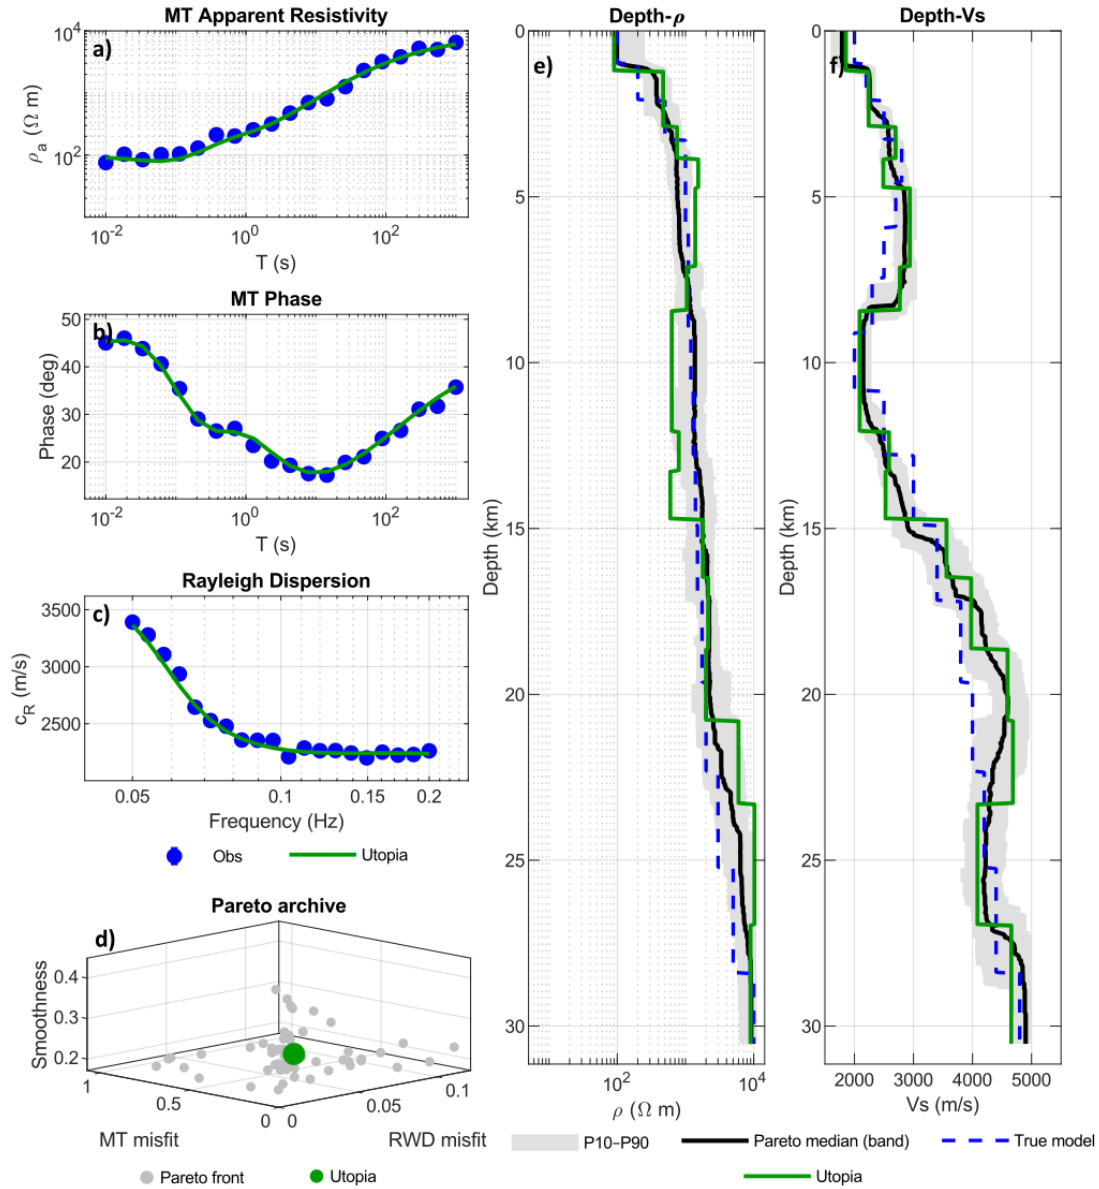

Figure S10. Results of noise-sensitivity example for the 10% noisy-decoupled case#2. a) Apparent resistivity, b) Phase data and c) RWD fit with the predicted responses of the utopia solution. d) Three-objective Pareto archive, highlighting the utopia solution. e)  $\rho(z)$  and f)  $V_s(z)$  for the true model and the selected utopia solution, together with the P10–P90 envelope and the Pareto-median profile from the repository.

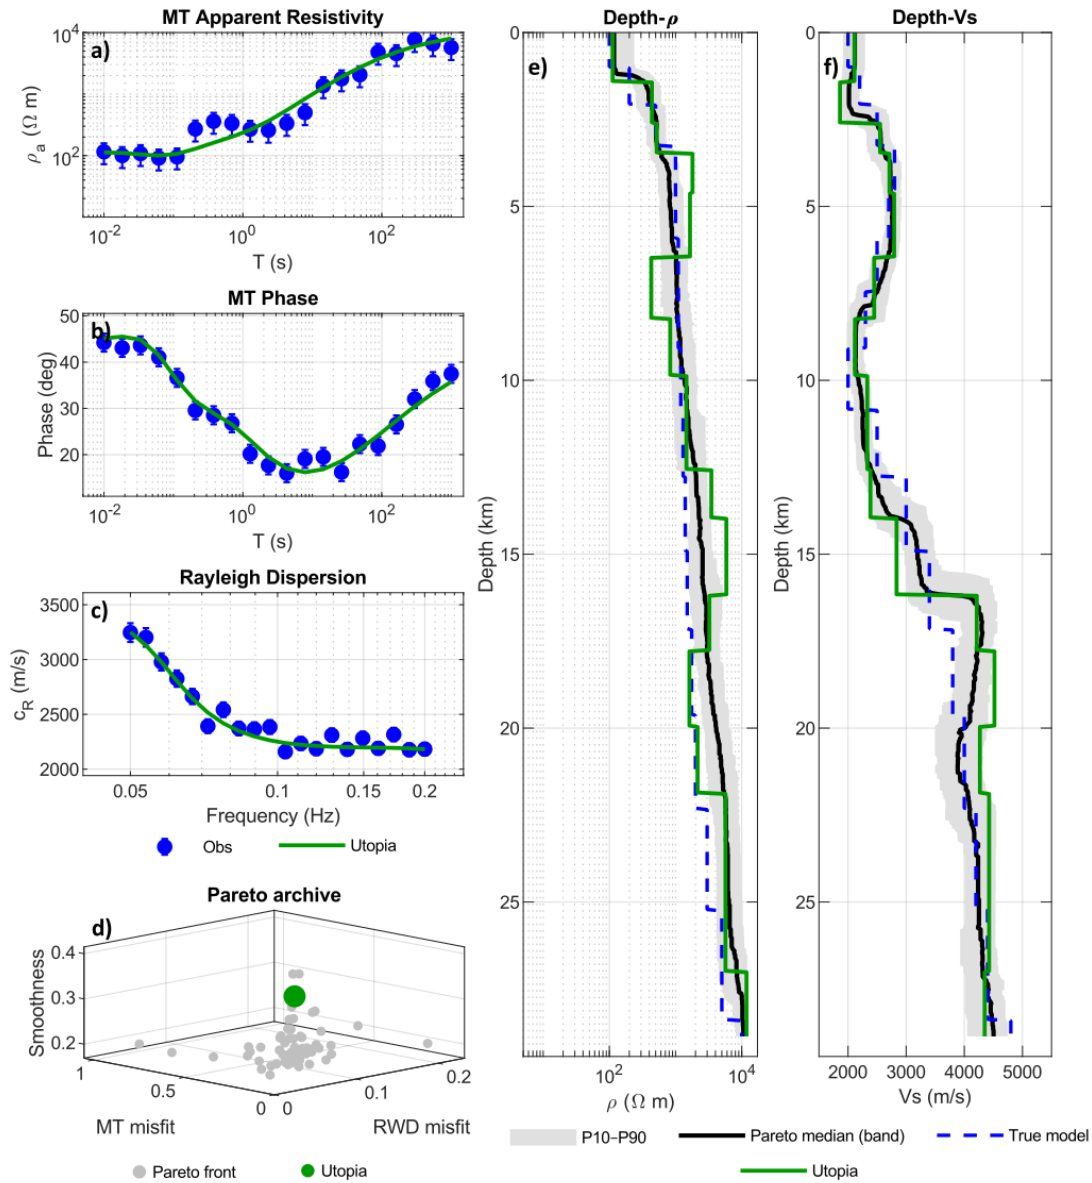

Figure S11. Results of noise-sensitivity example for the 20% noisy-decoupled case#2. a) Apparent resistivity, b) Phase data and c) RWD fit with the predicted responses of the utopia solution. d) Three-objective Pareto archive, highlighting the utopia solution. e)  $\rho(z)$  and f)  $V_s(z)$  for the true model and the selected utopia solution, together with the P10–P90 envelope and the Pareto-median profile from the repository.

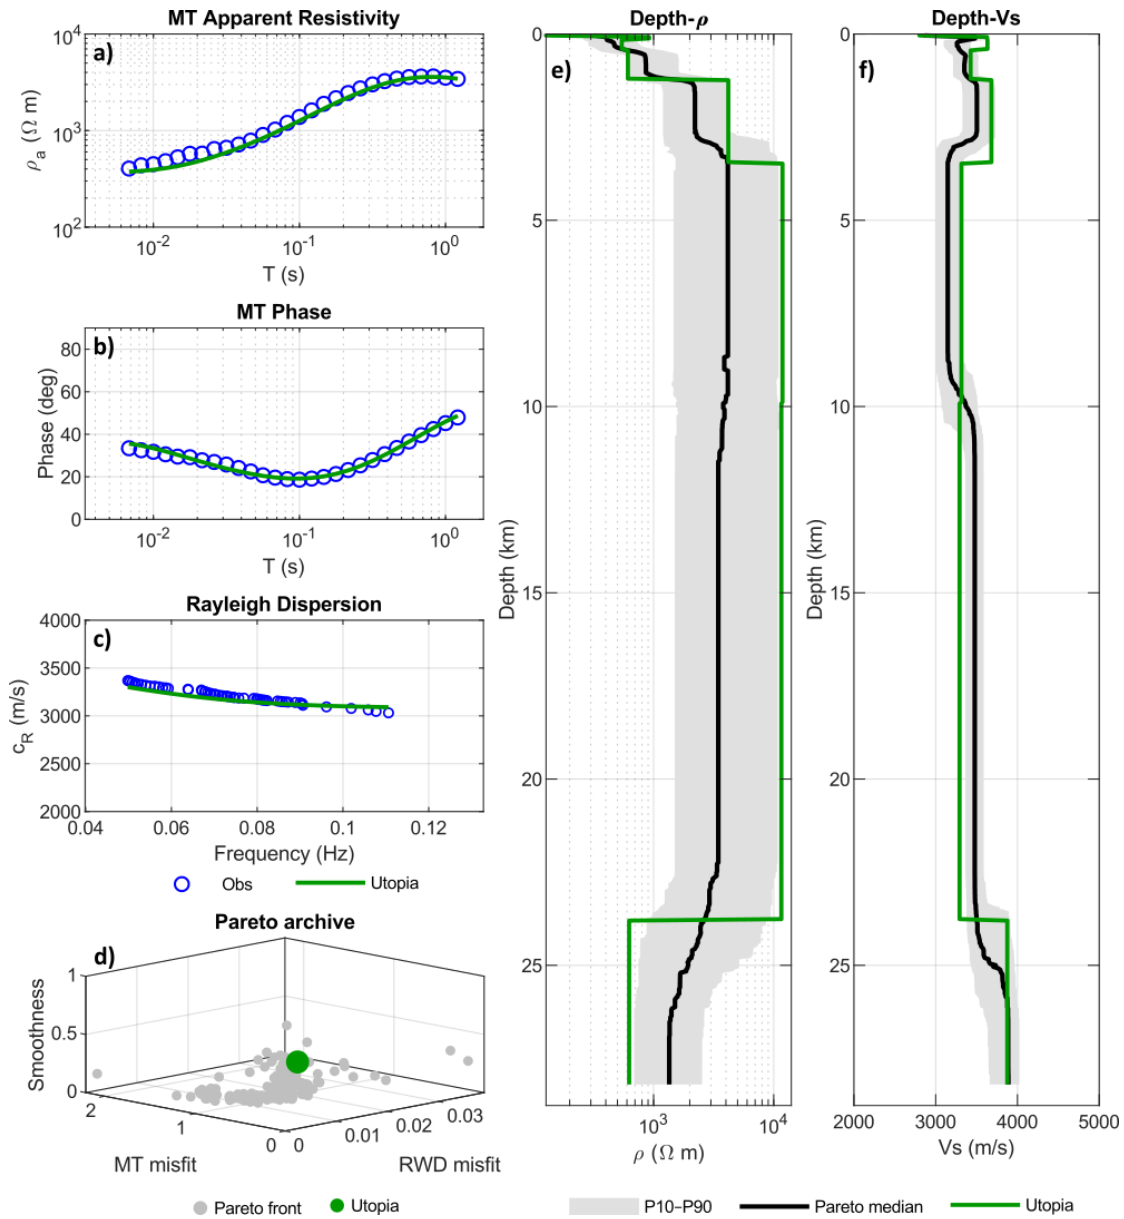

**Figure S12. Results of the *KEp* for  $h=8$  layers. a) Apparent resistivity, b) Phase data and c) RWD fit with the predicted responses of the utopia solution. d) Three-objective Pareto archive, highlighting the utopia solution. e)  $\rho(z)$  and f)  $V_s(z)$  models for the selected utopia solution, together with the P10–P90 envelope and the Pareto-median profile from the repository.**

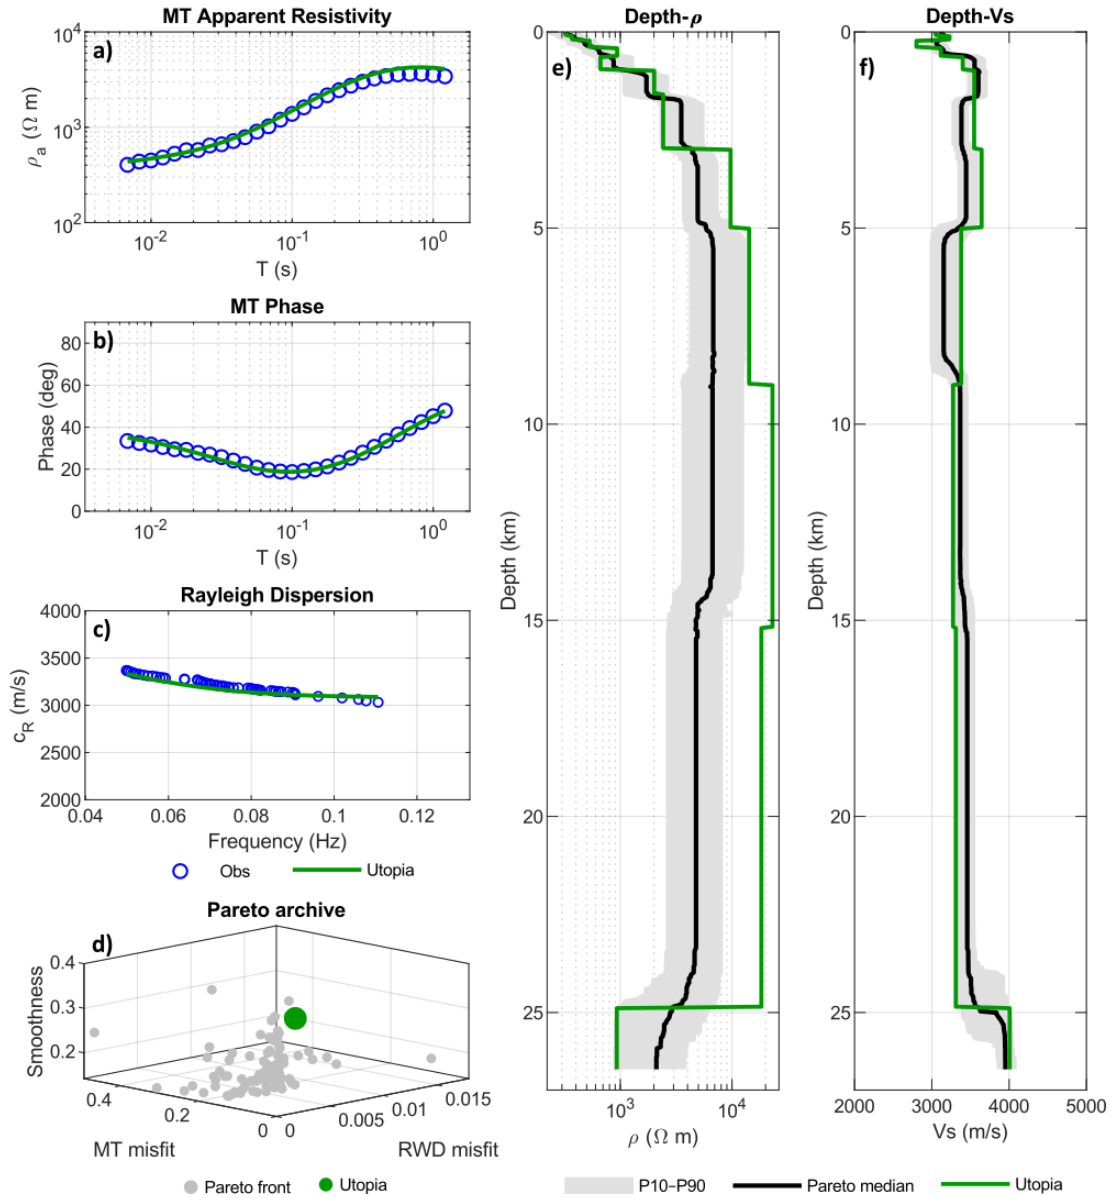

**Figure S13. Results of the  $KEp$  for  $h=12$  layers. a) Apparent resistivity, b) Phase data and c) RWD fit with the predicted responses of the utopia solution. d) Three-objective Pareto archive, highlighting the utopia solution. e)  $\rho(z)$  and f)  $V_s(z)$  models for the selected utopia solution, together with the P10–P90 envelope and the Pareto-median profile from the repository.**

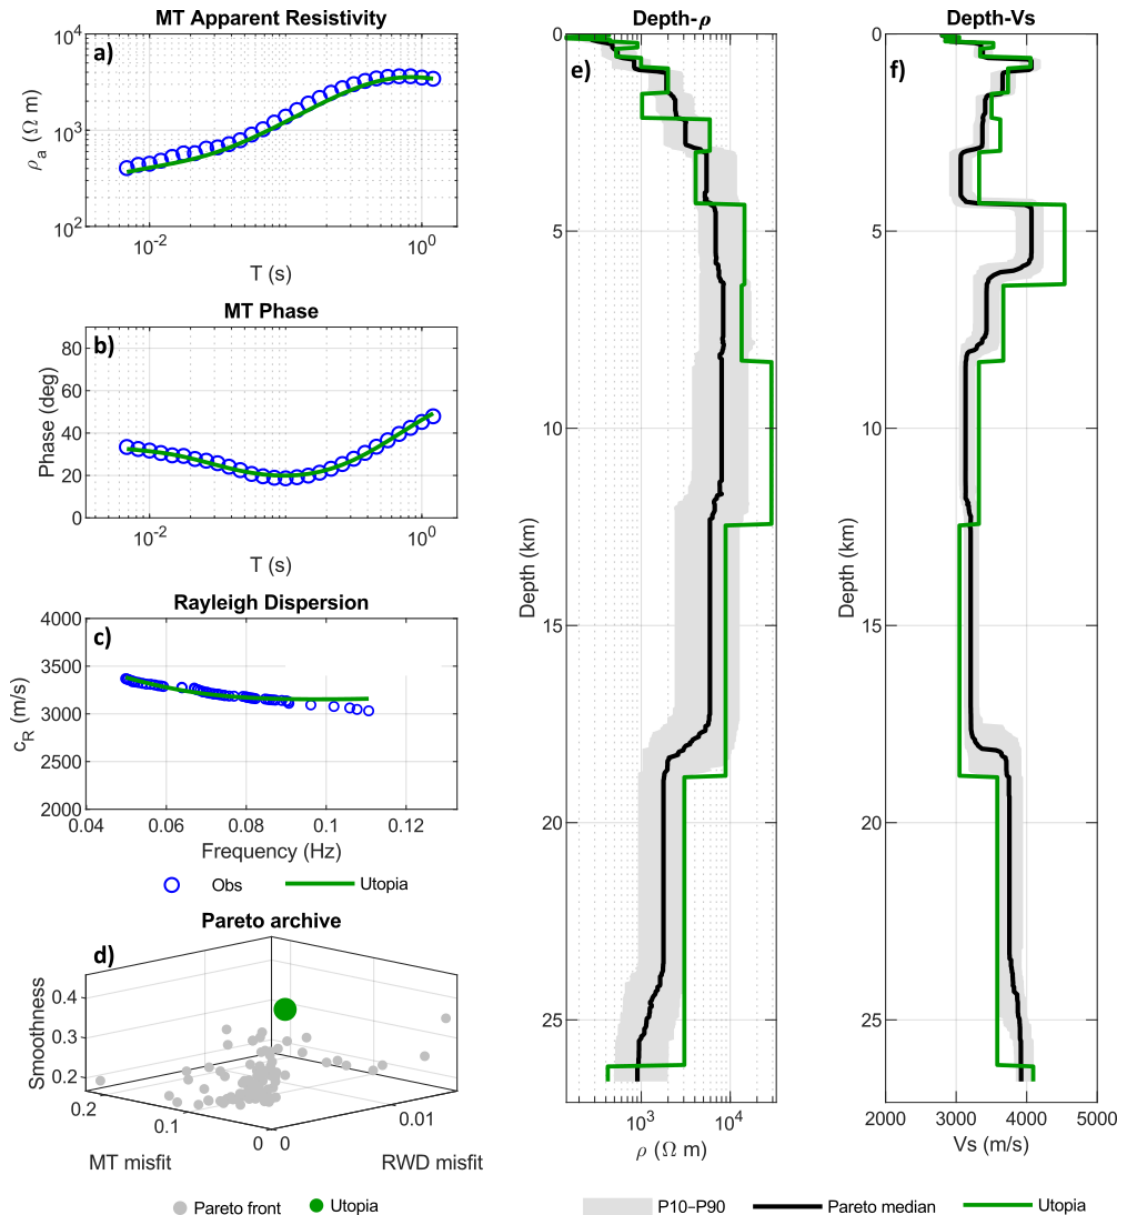

Figure S14. Results of the *KEp* for  $h = 16$  layers. a) Apparent resistivity, b) Phase data and c) RWD fit with the predicted responses of the utopia solution. d) Three-objective Pareto archive, highlighting the utopia solution. e)  $\rho(z)$  and f)  $V_s(z)$  models for the selected utopia solution, together with the P10–P90 envelope and the Pareto-median profile from the repository.

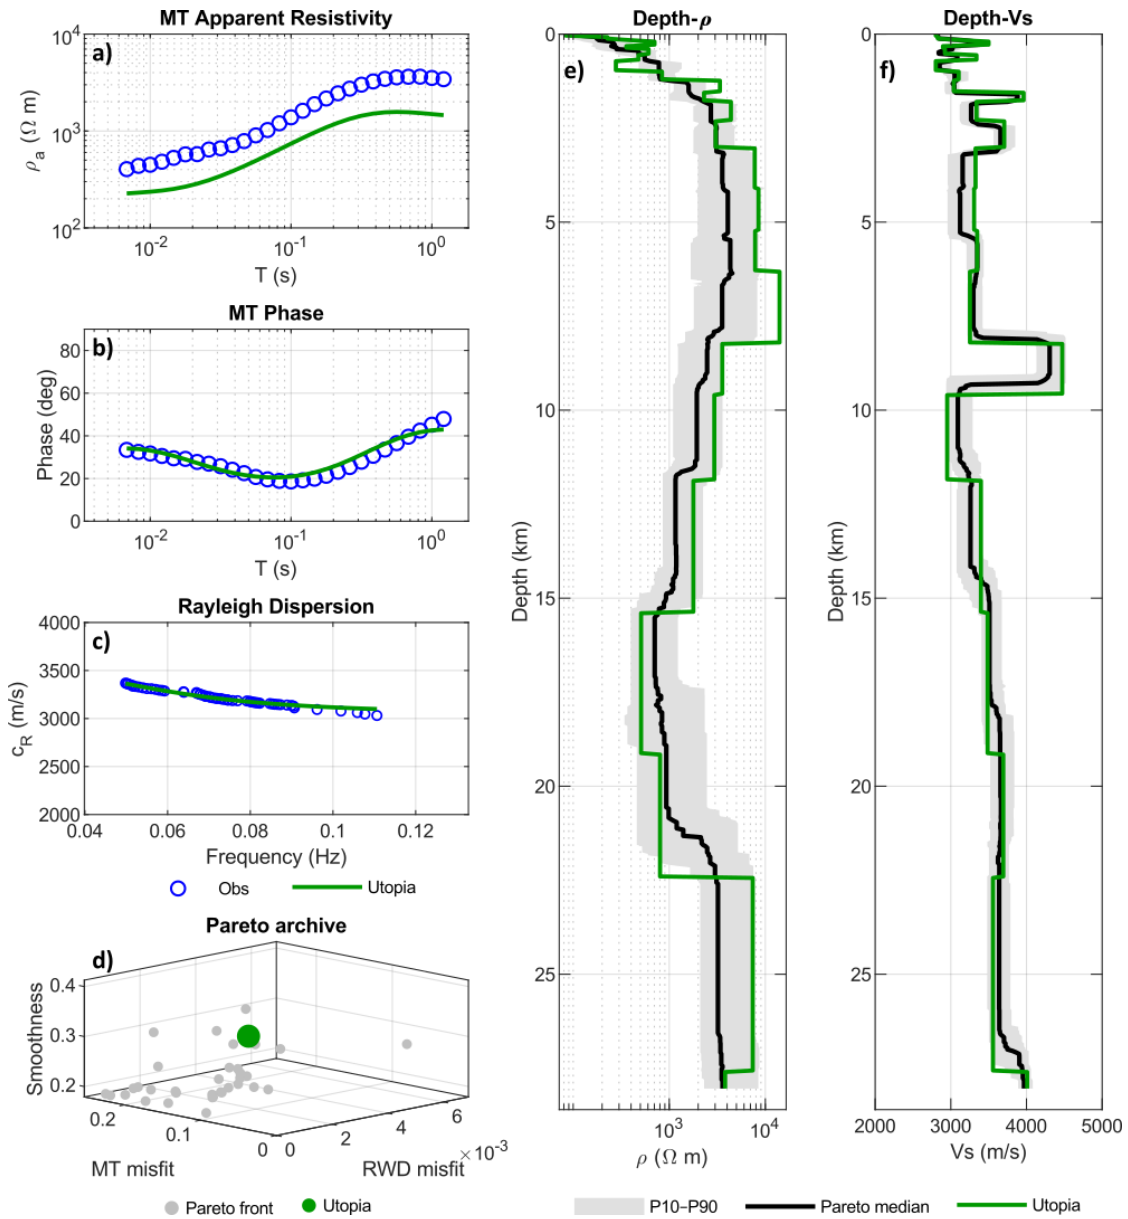

Figure S15. Results of the  $KEp$  for  $h=24$  layers. a) Apparent resistivity, b) Phase data and c) RWD fit with the predicted responses of the utopia solution. d) Three-objective Pareto archive, highlighting the utopia solution. e)  $\rho(z)$  and f)  $V_s(z)$  models for the selected utopia solution, together with the P10-P90 envelope and the Pareto-median profile from the repository.

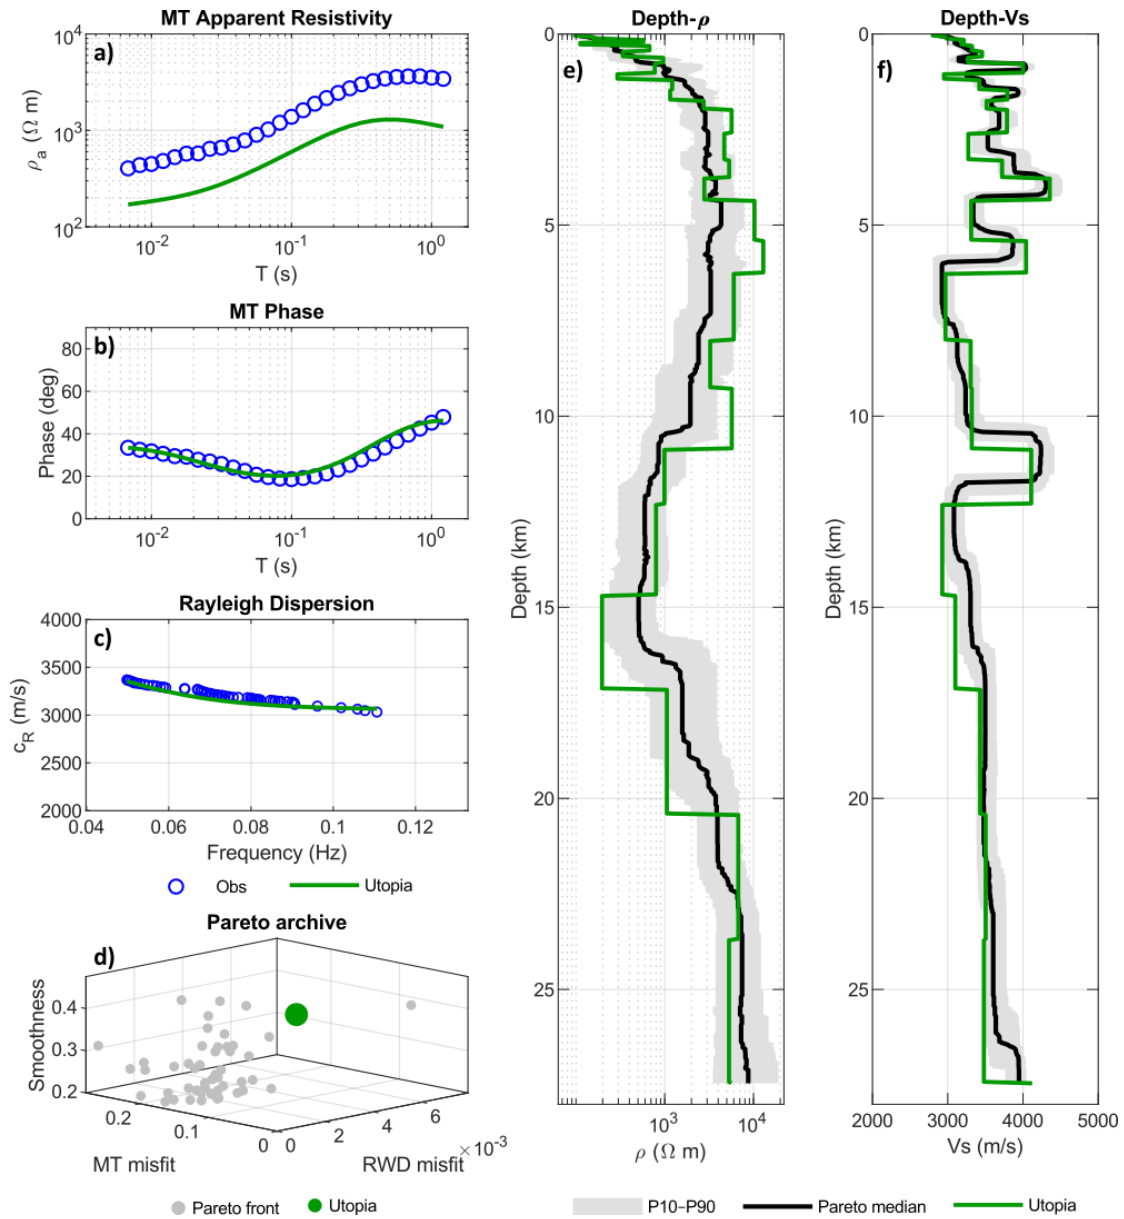

**Figure S16.** Results of the  $KEp$  for  $h=28$  layers. a) Apparent resistivity, b) Phase data and c) RWD fit with the predicted responses of the utopia solution. d) Three-objective Pareto archive, highlighting the utopia solution. e)  $\rho(z)$  and f)  $V_s(z)$  models for the selected utopia solution, together with the P10–P90 envelope and the Pareto-median profile from the repository.

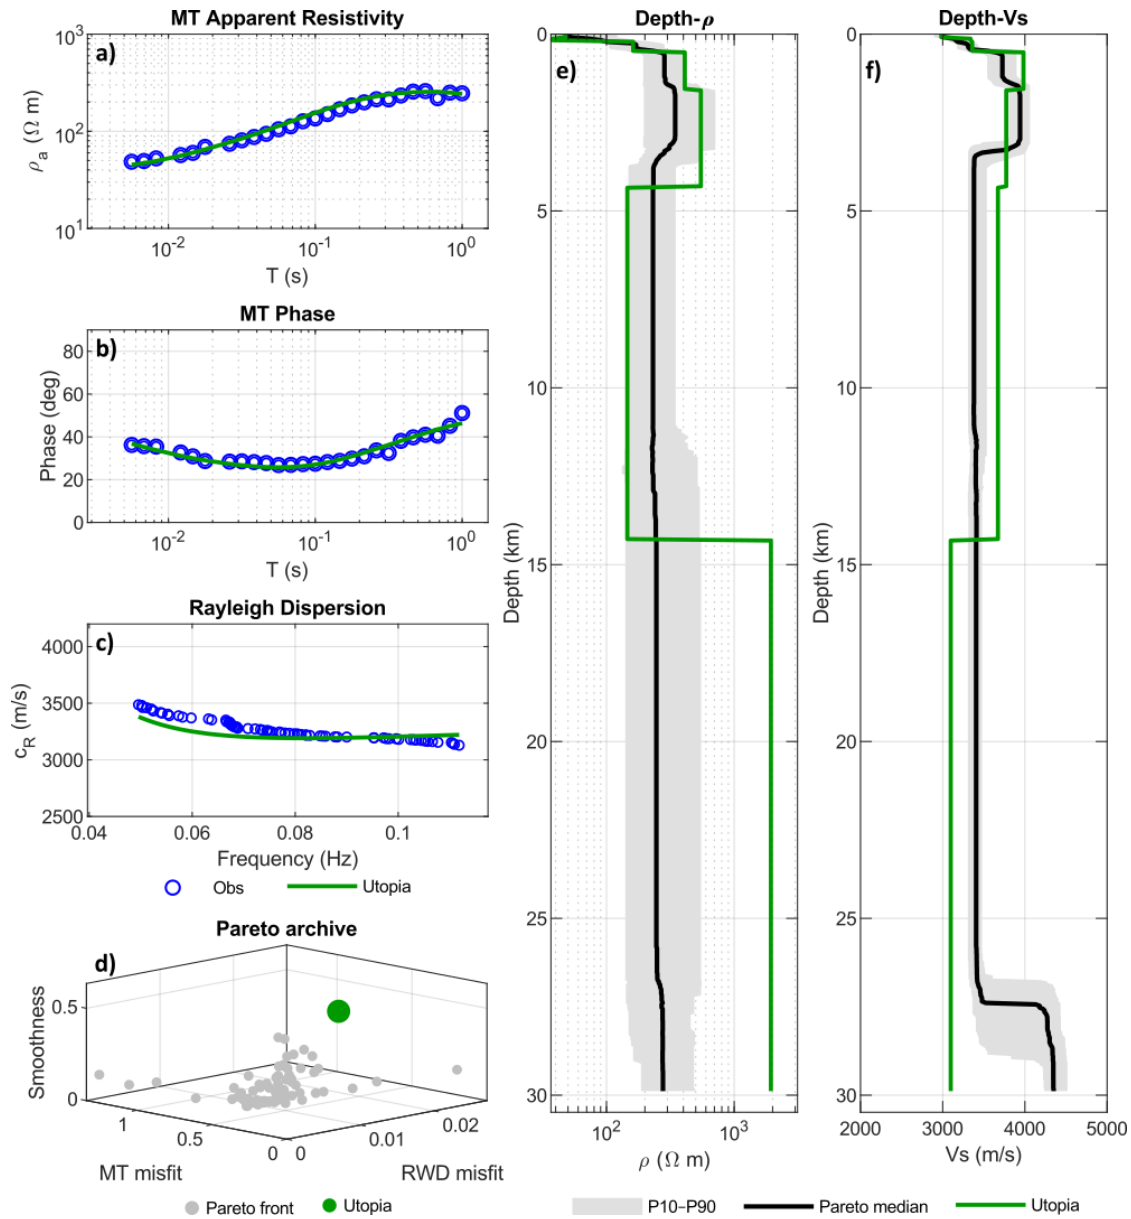

**Figure S17. Results of the *GBP* for  $h=8$  layers. a) Apparent resistivity, b) Phase data and c) RWD fit with the predicted responses of the utopia solution. d) Three-objective Pareto archive, highlighting the utopia solution. e)  $\rho(z)$  and f)  $V_s(z)$  models for the selected utopia solution, together with the P10–P90 envelope and the Pareto-median profile from the repository.**

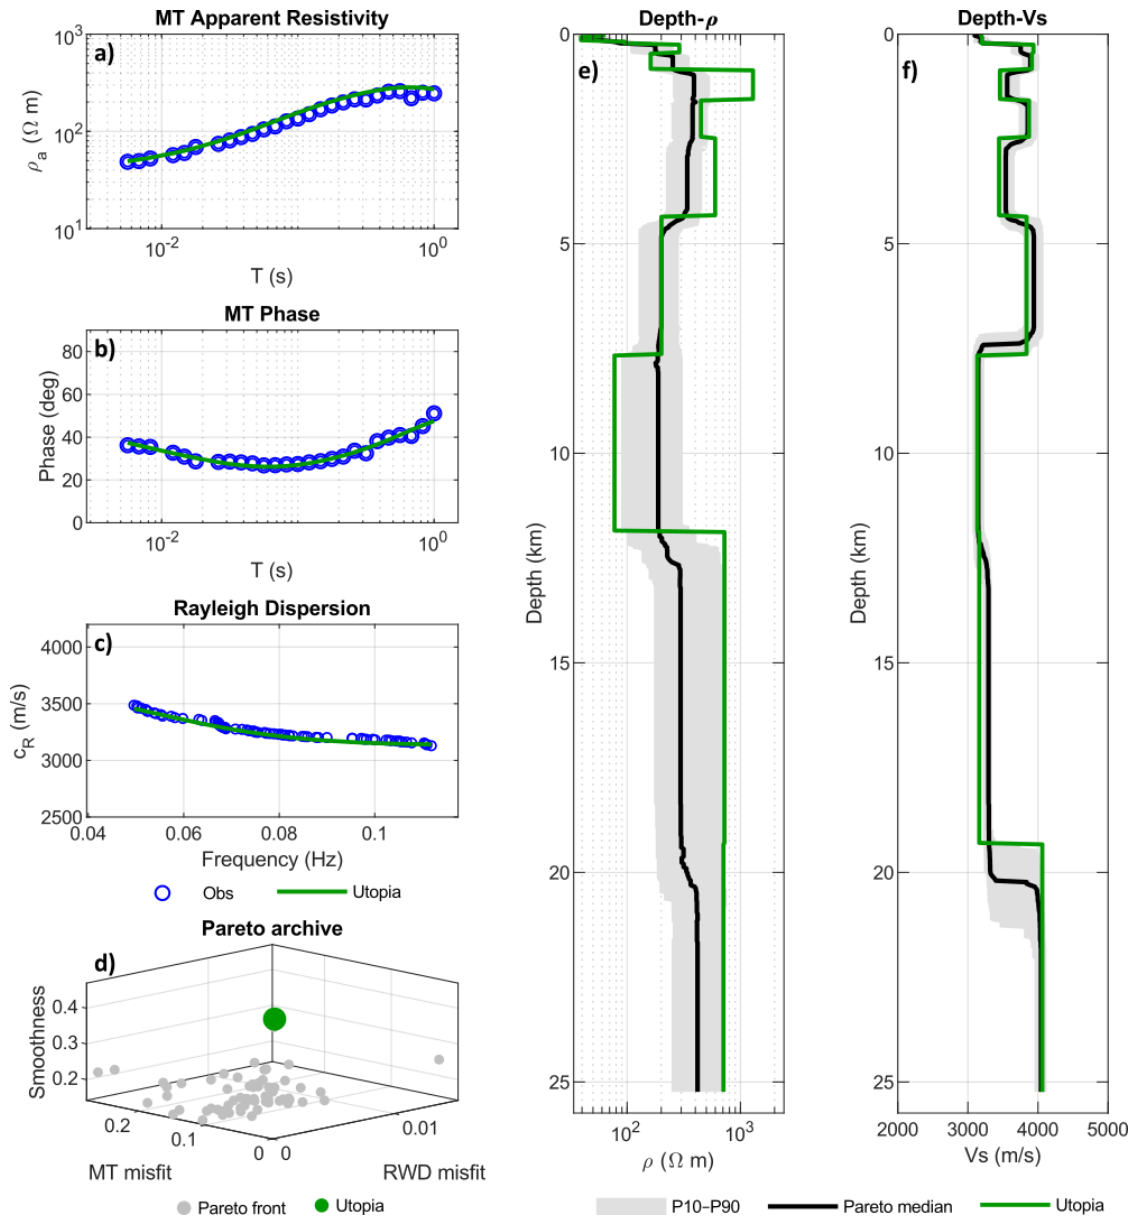

Figure S18. Results of the *GBP* for  $h = 12$  layers. a) Apparent resistivity, b) Phase data and c) RWD fit with the predicted responses of the utopia solution. d) Three-objective Pareto archive, highlighting the utopia solution. e)  $\rho(z)$  and f)  $V_s(z)$  models for the selected utopia solution, together with the P10–P90 envelope and the Pareto-median profile from the repository.

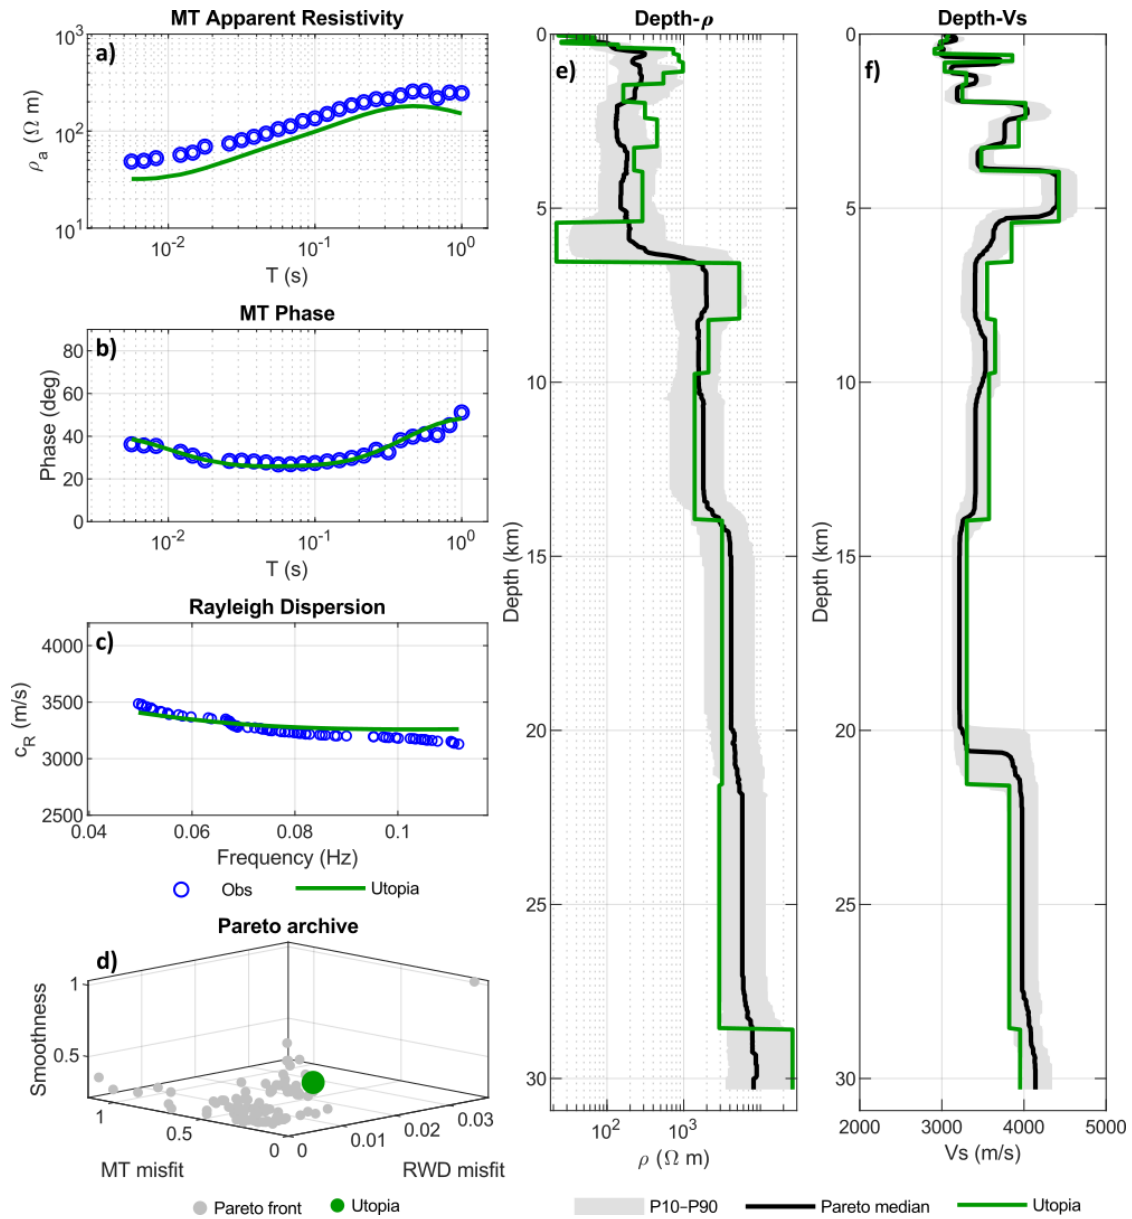

**Figure S19.** Results of the *GBP* for  $h = 20$  layers. a) Apparent resistivity, b) Phase data and c) RWD fit with the predicted responses of the utopia solution. d) Three-objective Pareto archive, highlighting the utopia solution. e)  $\rho(z)$  and f)  $V_s(z)$  models for the selected utopia solution, together with the P10–P90 envelope and the Pareto-median profile from the repository.

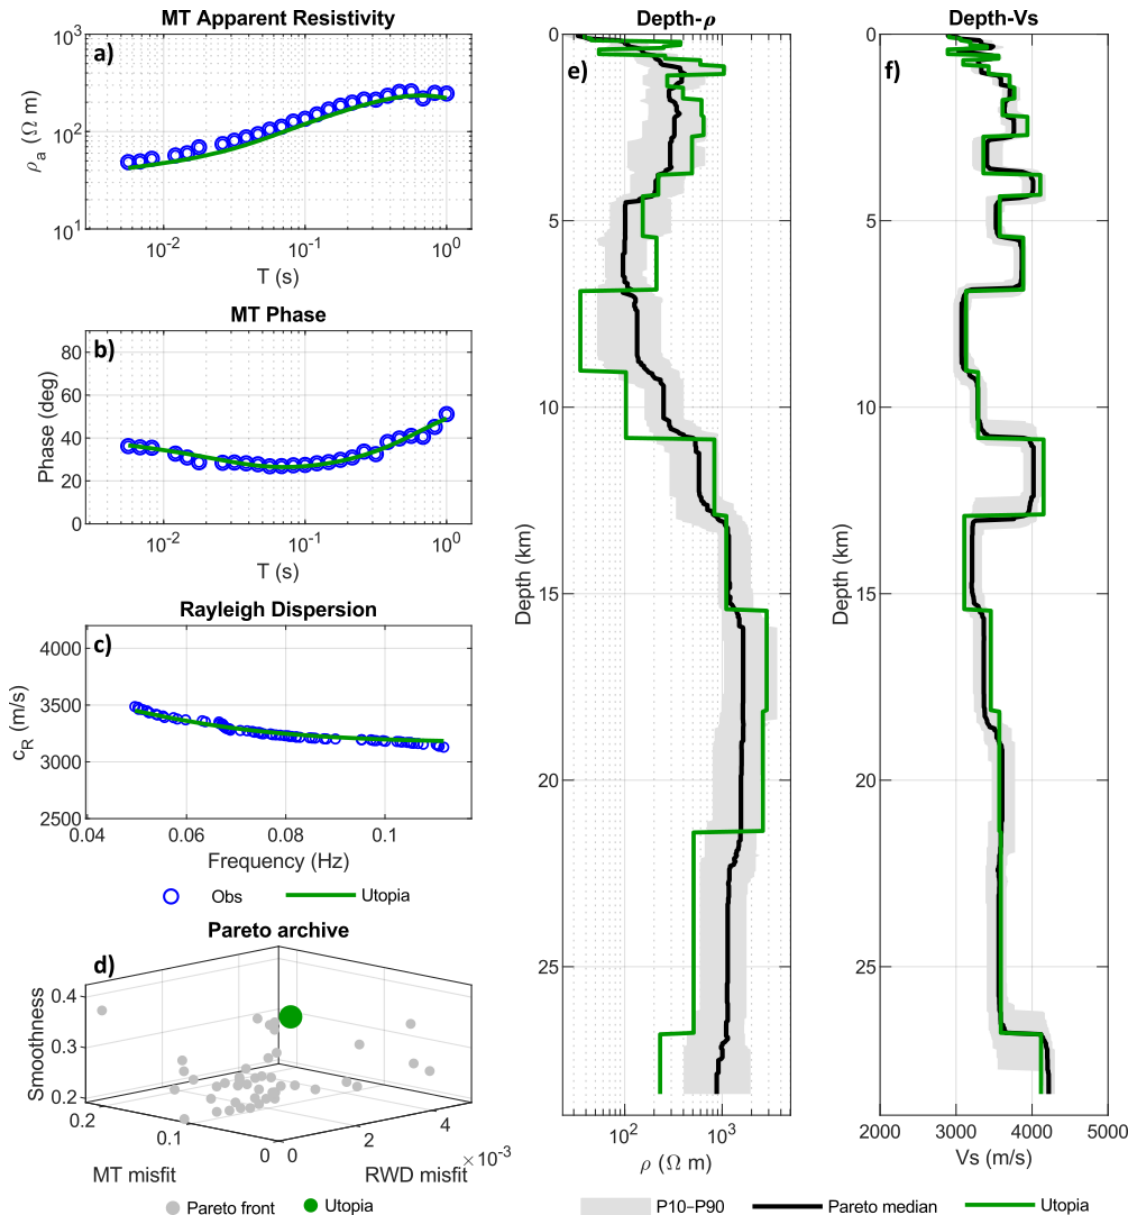

**Figure S20.** Results of the *GBP* for  $h=24$  layers. a) Apparent resistivity, b) Phase data and c) RWD fit with the predicted responses of the utopia solution. d) Three-objective Pareto archive, highlighting the utopia solution. e)  $\rho(z)$  and f)  $V_s(z)$  models for the selected utopia solution, together with the P10–P90 envelope and the Pareto-median profile from the repository.

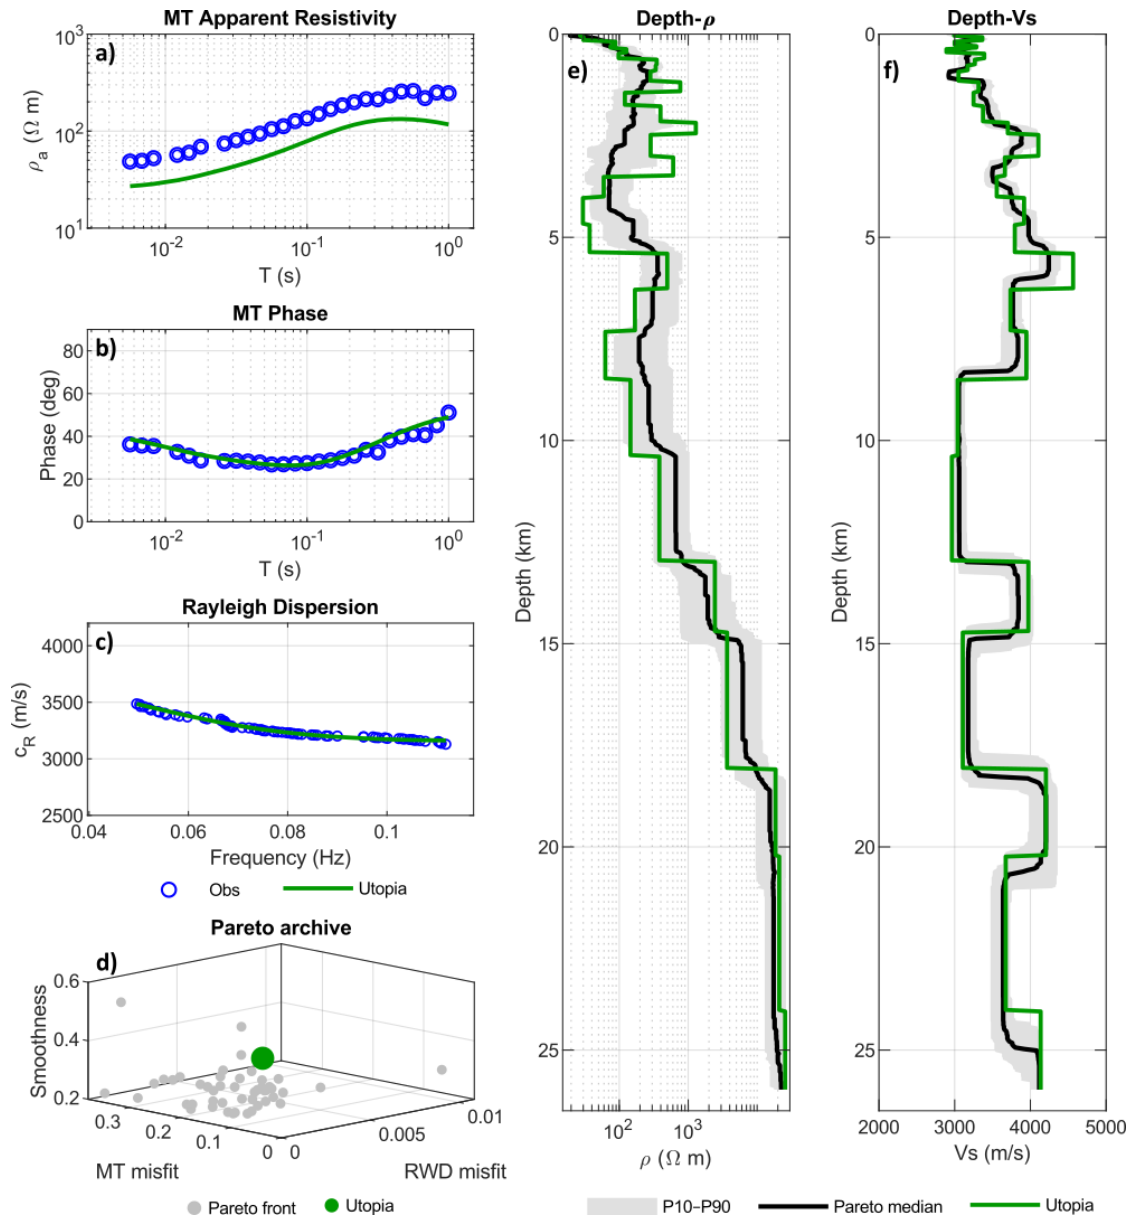

Figure S21. Results of the *GBP* for  $h=28$  layers. a) Apparent resistivity, b) Phase data and c) RWD fit with the predicted responses of the utopia solution. d) Three-objective Pareto archive, highlighting the utopia solution. e)  $\rho(z)$  and f)  $V_s(z)$  models for the selected utopia solution, together with the P10–P90 envelope and the Pareto-median profile from the repository.
